# Supplementary material for: Protocol for an online randomised controlled trial to evaluate the clinical and cost-effectiveness of a peer-supported self-management intervention for relatives of people with psychosis or bipolar disorder: Relatives Education And Coping Toolkit (REACT)
Source: PubMed Central journal article supplement (PMC5541455; doi:10.1136/bmjopen-2017-016965), 2017-07-18
Supplement: bmjopen-2017-016965.reviewer_comments.pdf [file bmjopen-2017-016965.reviewer_comments.pdf]

## PEER REVIEW HISTORY

BMJ Open publishes all reviews undertaken for accepted manuscripts. Reviewers are asked to complete a checklist review form (<http://bmjopen.bmj.com/site/about/resources/checklist.pdf>) and are provided with free text boxes to elaborate on their assessment. These free text comments are reproduced below.

## ARTICLE DETAILS

|                            |                                                                                                                                                                                                                                                                                                     |
|----------------------------|-----------------------------------------------------------------------------------------------------------------------------------------------------------------------------------------------------------------------------------------------------------------------------------------------------|
| <b>TITLE (PROVISIONAL)</b> | Protocol for an online randomised controlled trial to evaluate the clinical and cost effectiveness of a peer supported self-management intervention for relatives of people with psychosis or bipolar disorder: the Relatives Education And Coping Toolkit (REACT).                                 |
| <b>AUTHORS</b>             | Lobban, Fiona; Robinson, Heather; Appelbe, Duncan; Barraclough, Johanna; Bedson, Emma; Collinge, Elizabeth; Flowers, Susan; Honary, Mahsa; Johnson, Sonia; Mateus, Ceu; Mezes, Barbara; Minns, Valerie; Murray, Elizabeth; Walker, Andrew; Williamson, Paula; Wintermeyer, Catherine; Jones, Steven |

This article was not externally reviewed at BMJ Open. Protocols that have been independently assessed prior to submission to BMJ Open are usually fast-tracked to publication on the grounds that further substantial changes will not be possible. This independent assessment will usually be external, independent review for both a substantial grant award from a non-commercial or government funder and ethics approval.
